# Supplementary material for: The predatory bug Orius strigicollis shows a preference for egg-laying sites based on plant topography
Source: PeerJ. 2021 Jul 21;9:e11818. doi: 10.7717/peerj.11818 (PMC8308616; doi:10.7717/peerj.11818)
Supplement: Supplemental Information 3 [file peerj-09-11818-s003.xls]

## Sheet:  FIGURE1 A
Seam	Face		Head	Middle	Tail
100	0		15.3846	30.7692	53.8462
100	0		20.339	30.5085	49.1525
100	0		10.7692	32.3077	56.9231
72.3077	27.6923		10.6383	25.5319	63.8298
100	0		4.54545	9.09091	86.3636
88	12		31.8182	22.7273	45.4545
90.099	9.90099		10.989	27.4725	61.5385
100	0		4.22535	38.0282	57.7465
88.8889	11.1111		0	43.75	56.25
96.4286	3.57143		24.0741	33.3333	42.5926
96	4		12.5	39.5833	47.9167
95.4545	4.54545		10.7143	27.381	61.9048
97.2028	2.7972		8.63309	27.3381	64.0288
97.4359	2.5641		23.6842	30.2632	46.0526
100	0		14.8936	23.4043	61.7021
100	0		19.8246	40.3509	39.8246
100	0		7.2043	55.914	36.8817
100	0		17.7778	24.4444	57.7778
100	0		24.1379	37.931	37.931
100	0		10.3448	36.8965	52.7586
100	0		18.6441	45.7627	35.5932
100	0		19.3548	12.9032	67.7419
98.4375	1.5625		11.1111	55.5556	33.3333
100	0		8.06452	40.3226	51.6129
100	0		10	44	46
100	0		7.57576	34.8485	57.5758
100	0		10.3896	44.1558	45.4545
97.9167	2.08333		19.1489	27.6596	53.1915
96.2025	3.79747		5.26316	27.6316	67.1053
100	0		21.5686	33.3333	45.098
100	0		8.4507	47.8873	43.662
96.7213	3.27869		10.339	47.6271	42.0339
100	0		12.5	52.5	35
98.5714	1.42857		13.0435	42.1739	44.7826
100	0		23.1707	36.5854	40.2439
100	0		14.2857	40	45.7143
100	0		22.3881	34.3284	43.2836
98.2759	1.72414		12.2807	43.8596	43.8596
100	0		9.375	40.625	50
97.561	2.43902		12.5	25	62.5

## Sheet: FIUGRE1 B-C
Control	111	Nonchoice	61	Choicce	92
Control	90	Nonchoice	41	Choicce	82
Control	129	Nonchoice	48	Choicce	89
Control	127	Nonchoice	45	Choicce	100
Control	72	Nonchoice	40	Choicce	118
Control	116	Nonchoice	72	Choicce	92
Control	178	Nonchoice	77	Choicce	78
Control	119	Nonchoice	53	Choicce	84
Control	133	Nonchoice	39	Choicce	82
Control	107	Nonchoice	57	Choicce	82
Control	171	Nonchoice	75	Choicce	68
Control	149	Nonchoice	69	Choicce	93
Control	199	Nonchoice	48	Choicce	84
Control	148	Nonchoice	53	Choicce	83
Control	129	Nonchoice	75
Control	113	Nonchoice	41
Control	160	Nonchoice	44
Control	103	Nonchoice	61
Control	151	Nonchoice	48
Control	99

## Sheet: FIGURE1 D-E
Right Tail	Left Tail	Right Middle	Left Middle			Right Tip	Right Neck
43.1818	20.4545	9.09091	27.2727			53.5714	14.2857
40.4255	21.2766	8.51064	29.7872			62.069	3.44828
58.6207	5.17241	20.6897	15.5172			72.973	18.9189
64.2857	7.14286	28.5714	0			73.3333	16.6667
66.6667	23.8095	4.7619	4.7619			52.6316	21.0526
63.3333	3.33333	13.3333	20			90	5
37.037	32.0988	7.40741	23.4568			30.3571	23.2143
41.1765	19.1176	5.88235	33.8235			34.1463	34.1463
37.5	18.75	4.16667	39.5833			66.6667	0
34.1463	21.9512	14.6341	29.2683			60.8696	0
30.9524	23.8095	16.6667	28.5714			54.3478	2.17391
58.6667	10.6667	2.66667	28			46.1538	38.4615
32.2835	37.7953	11.0236	18.8976			32.5843	13.4831
41.3793	18.9655	0	39.6552			28.5714	40
65	7.5	0	27.5			72.4138	17.2414
32.5	10	12.5	45			76.4706	0
19.4805	12.987	16.8831	50.6494			60	0
70.2703	0	0	29.7297			100	0
22.7273	27.2727	0	50			45.4545	0
30.7692	5.76923	0	63.4615			68.4211	15.7895
41.6667	2.08333	0	56.25			90.4762	4.7619
76	8	0	16			66.6667	23.8095
17.8571	19.6429	8.92857	53.5714			47.619	0
35.0877	21.0526	17.5439	26.3158			62.5	0
51.1111	0	2.22222	46.6667			100	0
27.8689	34.4262	4.91803	32.7869			36.8421	7.89474
34.7826	15.942	0	49.2754			48.5714	20
52.6316	13.1579	13.1579	21.0526			36	44
54.1667	16.6667	5.55556	23.6111			45.098	31.3725
42.5	15	5	37.5			73.913	0
36.9231	10.7692	1.53846	50.7692			77.4194	0
21.2766	6.38298	0	72.3404			76.9231	0
28.5714	0	0	71.4286			78.5714	21.4286
26.6667	13.3333	20	40			62.5	4.16667
36.5079	15.873	17.4603	30.1587			48.4848	21.2121
39.5833	2.08333	0	58.3333			90	5
50	5.76923	1.92308	42.3077			89.6552	0
48	2	6	44			84	12
55.1724	0	0	44.8276			75	25
28.5714	42.8571	0	28.5714			40	0

## Sheet: FIGURE2 A-B
Tip	Neck	Middle-R	Middle-L	Tail-L		Tip-R	Middle-L
85.7143	80	85.7143	80	70		105	154
90.3226	77.7778	90.3226	77.7778	64.4444		80	137
74.0741	100	74.0741	100	97.1795		86	122
75	83.3333	75	83.3333	66.6667		100	173
87.5	72.2222	87.5	66.6667	50		84	164
61.5385	69.2308	46.1538	69.2308	100		91	99
100	85.7143	100	85.7143	57.1429		109	132
87.1795	100	87.1795	100	62.5		86	109
100	75	100	75	81.6667		97	162
83.3333	66.6667	83.3333	66.6667	46.6667		105	158
100	77.7778	100	77.7778	100		113	125
78.9474	100	68.4211	100	100		107	100
71.4286	85.7143	71.4286	71.4286	87.1795		104	128
72.2222	88.8889	72.2222	77.7778	77.7778		98	133
83.2455	100	77.7778	100	90.3226		101	159
79.235	85.7143	100	77.7778	77.7778		97.7333	137
87.255	100	77.7778	100	90.3226
89.6773	85.7143	44.4444	77.7778	100
95.4567	57.1429	100	94.4444	94.4444
83.4936	82.7267	80.2933	82.2505	80.4773
